# Supplementary material for: Acalculous Cholecystitis as a Complication of Primary Epstein-Barr Virus Infection: A Case-Based Scoping Review of the Literature
Source: MDPI journal article supplement (doi:10.3390/v16030463), 2024-03-18
Supplement: s1 [file s1]

Table S1. Methodological Quality Assessment Tool for Case-Reports/Series by Murad et al. [8]

| Domain        | Leading Explanatory Questions                                                                                                                                              | Assessment Criteria |
|---------------|----------------------------------------------------------------------------------------------------------------------------------------------------------------------------|---------------------|
| Selection     | Does the patient(s) represent the whole experience of the investigator (center), or is the selection method unclear?                                                       | Yes/No              |
| Ascertainment | Was the exposure adequately ascertained?                                                                                                                                   | Yes/No              |
|               | Was the outcome adequately ascertained?                                                                                                                                    | Yes/No              |
|               | Were other alternative causes that may explain the observation ruled out?                                                                                                  | Yes/No              |
| Follow-up     | Was follow-up long enough for outcomes to occur?                                                                                                                           | Yes/No              |
| Reporting     | Is the case(s) described with sufficient details to allow other investigators to replicate the research or practitioners to make inferences related to their own practice? | Yes/No              |

Table S2. Methodological Quality Assessment of Included Case Reports and Case Series Using the Tool Suggested by Murad et al. [8]

| Study Reference        | Patient Selection | Ascertainment of EBV Infection | Ascertainment of AAC | Ruling Out Alternative Causes | Sufficient Follow-up | Detailed Reporting | Inclusion in the Review |
|------------------------|-------------------|--------------------------------|----------------------|-------------------------------|----------------------|--------------------|-------------------------|
| Fretzayas A. et al [4] | Yes               | Yes                            | Yes                  | Yes                           | Yes                  | Yes                | Yes                     |
| Beltrame               | Yes               | Yes                            | Yes                  | Yes                           | Yes                  | Yes                | Yes                     |

|                                         |     |     |     |     |     |     |     |
|-----------------------------------------|-----|-----|-----|-----|-----|-----|-----|
| V.et al [9]                             |     |     |     |     |     |     |     |
| Attilakos<br>A.et al [10]               | Yes |
| Arya S.O.et<br>al [11]                  | Yes |
| Suga K.et al<br>[12]                    | Yes |
| Gagneux-<br>BrunonA.et<br>al [13]       | Yes |
| Iaria C.et al<br>[14]                   | Yes |
| Prassouli<br>A.et al [15]               | Yes |
| Cholongitas<br>E.et al [16]             | Yes |
| Lagona E.et<br>al [17]                  | Yes |
| Ono S.et al<br>[18]                     | Yes |
| Majdalani<br>M.et al [19]               | Yes |
| Koufakis<br>T.et al [20]                | Yes |
| Rodà D.et<br>al [21]                    | Yes |
| Branco L.et<br>al [22]                  | Yes |
| Pawłowska-<br>Kamieniak<br>A.et al [23] | Yes |
| Alkhoury<br>F.et al [24]                | Yes |
| Agergaard<br>J.et al [25]               | Yes |
| Koch A.                                 | Yes |

|                                |     |     |     |     |     |     |     |
|--------------------------------|-----|-----|-----|-----|-----|-----|-----|
| D.et al [26]                   |     |     |     |     |     |     |     |
| Yang H.<br>N.et al [27]        | Yes |
| Rezkallah<br>KN.et al<br>[28]  | Yes |
| Yoshie K.et<br>al [29]         | Yes |
| Pelliccia<br>P.et al [30]      | Yes |
| Hagel S.et<br>al [31]          | Yes |
| Nagdev<br>A.et al [32]         | Yes |
| Carrascosa<br>MF.et al<br>[33] | Yes |
| Strehle E.et<br>al [34]        | Yes |
| Sheybani<br>F.et al [35]       | Yes |
| Yesilbag<br>Z.et al [36]       | Yes |
| Cameron<br>A.et al [37]        | Yes |
| Höhn P.et<br>al [38]           | Yes |
| Boninsegna<br>S.et al [39]     | Yes |
| Young C.et<br>al [40]          | Yes |
| Ntelis K. et<br>al [41]        | Yes |
| Suda T.et al<br>[42]           | Yes |
| Langenohl                      | Yes |

|                                      |     |     |     |     |     |     |     |
|--------------------------------------|-----|-----|-----|-----|-----|-----|-----|
| R. et al [43]                        |     |     |     |     |     |     |     |
| Leganés Villanueva C. et al [44]     | Yes |
| Nakagawa H. et al [45]               | Yes |
| Harvey KG. et al [46]                | Yes |
| Rein J. et al [47]                   | Yes |
| Avcu G. et al [48]                   | Yes |
| Celik F. et al [49]                  | Yes |
| Teopoulos Lamprianidis K. et al [50] | Yes |
| Barkho F. et al [51]                 | Yes |
| Trbojević T. et al [52]              | Yes |
| Teles H. et al [53]                  | Yes |
| Khan U et al [54]                    | Yes |
| <b>Imad, H. A., et al [89]</b>       | Yes | Yes | Yes | No  | Yes | Yes | No  |
| <b>Guri A, et al [90]</b>            | Yes | Yes | No  | Yes | Yes | Yes | No  |
